# Supplementary material for: Distribution and Clonal Diversity of Staphylococcus aureus and Other Staphylococci in Surface Waters: Detection of ST425-t742 and ST130-t843 mecC-Positive MRSA Strains
Source: MDPI journal article supplement (doi:10.3390/antibiotics10111416), 2021-11-19
Supplement: s1 [file s1]

## Supplementary Materials

**Table S1.** Origin, source and location of the 78 surface waters samples recovered in this study and respective isolates.

| Sample | Origin (location)                         | Source   | Lotic/Lentic water | Coordinates                 | Date       | Isolates recovered                                          |
|--------|-------------------------------------------|----------|--------------------|-----------------------------|------------|-------------------------------------------------------------|
| 1      | Lago Biodiversidade (Campeã, Vila Real)   | Lake     | lentic             | 41°17'08.5"N<br>7°51'09.9"W | 09/09/2019 | <i>S. aureus</i><br>VS2851, <i>S. epidermidis</i> VS2884    |
| 2      | Fonte (Arrabães, Vila Real)               | Fountain | lentic             | 41°16'54.6"N<br>7°48'48.1"W | 09/09/2019 |                                                             |
| 3      | Barragem do Sordo (Vila Real)             | Dam      | lentic             | 41°16'09.9"N<br>7°47'20.9"W | 09/09/2019 | <i>S. aureus</i> VS2850                                     |
| 4      | Rio Corgo, parque corgo (Vila Real)       | River    | lotic              | 41°18'22.9"N<br>7°44'03.7"W | 09/09/2019 | <i>S. epidermidis</i><br>VS2885, <i>S. sciuri</i><br>VS2895 |
| 5      | Rio Douro (Pocinho)                       | River    | lotic              | 41°08'01.9"N<br>7°07'10.9"W | 30/09/2019 | <i>S. aureus</i> VS2853                                     |
| 6      | Rio Sabor (Torre de Moncorvo)             | River    | lotic              | 41°10'44.4"N<br>7°06'35.0"W | 30/09/2019 | <i>S. aureus</i> VS2855                                     |
| 7      | Barragem de Carviçais (Carviçais)         | Dam      | lentic             | 41°11'19.9"N<br>6°55'34.7"W | 30/09/2019 | <i>S. aureus</i> VS2854                                     |
| 8      | Barragem de Santa Justa (Alfândega da Fé) | Dam      | lentic             | 41°19'48.6"N<br>7°01'32.8"W | 07/10/2019 | <i>S. aureus</i> VS2858                                     |
| 9      | Lago Vilariça (Vilariça)                  | Lake     | lentic             | 41.378284, -<br>6.610304    | 07/10/2019 | <i>S. aureus</i> VS2852                                     |
| 10     | Ribeira da Vilariça (Vilariça)            | Stream   | lotic              | 41°16'17.9"N<br>7°05'30.0"W | 07/10/2019 |                                                             |

|    |                                                |          |        |                             |            |                                                        |
|----|------------------------------------------------|----------|--------|-----------------------------|------------|--------------------------------------------------------|
| 11 | Barragem Penereiro (Vila Flor)                 | Dam      | lentic | 41°17'39.7"N<br>7°10'18.8"W | 07/10/2019 |                                                        |
| 12 | Fonte (Vila Flor)                              | Fountain | lentic | 41°18'25.3"N<br>7°09'11.0"W | 07/10/2019 | <i>S. aureus</i> VS2857                                |
| 13 | Barragem de Fonte Longa (Carrazeda de Ansiães) | Dam      | lentic | 41°13'51.1"N<br>7°16'44.5"W | 07/10/2019 | <i>S. aureus</i> VS2856                                |
| 14 | Barragem de Vila Chã (Vila Chã)                | Dam      | lentic | 41°18'31.5"N<br>7°29'22.8"W | 07/10/2019 |                                                        |
| 15 | Barragem da Castanheira (Bragança)             | Dam      | lentic | 41°47'08.5"N<br>6°49'16.7"W | 14/10/2019 | <i>S. sciuri</i> VS2898                                |
| 16 | Rio Fervença (Bragança)                        | River    | lotic  | 41°48'15.6"N<br>6°45'24.6"W | 14/10/2019 | <i>S. sciuri</i> VS2899                                |
| 17 | Rio Sabor (França)                             | River    | lotic  | 41°54'07.8"N<br>6°44'07.6"W | 14/10/2019 |                                                        |
| 18 | Ribeira do Ornal (Bragança)                    | Stream   | lotic  | 41°53'34.1"N<br>6°50'22.1"W | 14/10/2019 | <i>S. aureus</i> VS2860                                |
| 19 | Rio Baceiro (Bragança)                         | River    | lotic  | 41°53'53.3"N<br>6°51'11.1"W | 14/10/2019 | <i>S. aureus</i><br>VS2859, <i>S. sciuri</i><br>VS2896 |
| 20 | Ribeira da Granja (Bragança)                   | Stream   | lotic  | 41°49'30.0"N<br>6°46'15.2"W | 14/10/2019 | <i>S. sciuri</i> VS2897                                |
| 21 | Rio Soutelo (Benagouro, Vila Real)             | River    | lotic  | 41°21'59.6"N<br>7°43'36.3"W | 21/10/2019 | <i>S. sciuri</i> VS2907                                |
| 22 | Ribeira de Borralheira (Benagouro, Vila Real)  | Stream   | lotic  | 41°22'33.2"N<br>7°43'07.4"W | 21/10/2019 | <i>S. aureus</i><br>VS2872, <i>S. succinus</i> VS2924  |

|    |                                      |                  |        |                             |            |                                                                                                                                 |
|----|--------------------------------------|------------------|--------|-----------------------------|------------|---------------------------------------------------------------------------------------------------------------------------------|
| 23 | Ribeira da Mãe de Água (Vila Chã)    | Stream           | lotic  | 41°25'15.2"N<br>7°41'07.0"W | 21/10/2019 | <i>S. sciuri</i> VS2917                                                                                                         |
| 24 | Lagoa do Alvão (Vila Real)           | Lake             | lentic | 41°30'20.0"N<br>7°39'49.1"W | 21/10/2019 | <i>S. aureus</i> VS2878                                                                                                         |
| 25 | Rio Torno (Vila Pouca de Aguiar)     | River            | lotic  | 41°31'13.3"N<br>7°40'05.4"W | 21/10/2019 | <i>S. aureus</i><br>VS2862, <i>S. sciuri</i><br>VS2908                                                                          |
| 26 | Regadio canal (Vila Pouca de Aguiar) | Irrigation ditch | lotic  | 41°30'03.0"N<br>7°40'03.3"W | 21/10/2019 | <i>S. aureus</i><br>VS2861, <i>S. sciuri</i><br>VS2909                                                                          |
| 27 | Lago Parque Termal (Pedras Salgadas) | Lake             | lentic | 41°32'54.1"N<br>7°36'18.3"W | 21/10/2019 | <i>S. sciuri</i> VS2915                                                                                                         |
| 28 | Rio Avelames (Sabroso de Aguiar)     | River            | lotic  | 41°33'49.5"N<br>7°36'01.1"W | 21/10/2019 | <i>S. sciuri</i> VS2914                                                                                                         |
| 29 | Ribeira de Oura (Chaves)             | Stream           | lotic  | 41°38'16.4"N<br>7°34'09.7"W | 21/10/2019 | <i>S. aureus</i><br>VS2871, <i>S. xy-</i><br><i>losus</i> VS2931, <i>S.</i><br><i>lentus</i> VS2893<br><i>S. lentus</i> VS2892, |
| 30 | Rio Tâmega (Chaves)                  | River            | lotic  | 41°44'20.4"N<br>7°27'55.9"W | 21/10/2019 | <i>S. xylosus</i><br>VS2929, <i>S. sciuri</i><br>VS2918                                                                         |
| 31 | Regadio/canal (Chaves)               | Irrigation ditch | lotic  | 41°45'01.1"N<br>7°26'40.8"W | 21/10/2019 | <i>S. aureus</i><br>VS2863, <i>S. sciuri</i><br>VS2911                                                                          |
| 32 | Fonte (Abob-eleira)                  | Fountain         | lentic | 41°45'16.0"N<br>7°29'39.9"W | 21/10/2019 | <i>S. sciuri</i> VS2906                                                                                                         |
| 33 | Regadio (Vilar de Perdizes)          | Irrigation ditch | lotic  | 41°51'07.9"N<br>7°37'58.1"W | 28/10/2019 | MRSA VS2846,<br><i>S. sciuri</i> VS2900                                                                                         |

|    |                                              |                  |        |                             |            |                                                                               |
|----|----------------------------------------------|------------------|--------|-----------------------------|------------|-------------------------------------------------------------------------------|
| 34 | Rio Assureira<br>(Vilar de Perdizes)         | River            | lotic  | 41°50'02.4"N<br>7°37'27.5"W | 28/10/2019 | <i>S. sciuri</i> VS2905,<br><i>S. lentus</i> VS2890                           |
| 35 | Rio Porto do Rei<br>Bubal (Vila de Perdizes) | River            | lotic  | 41°52'39.6"N<br>7°38'40.5"W | 28/10/2019 | <i>S. xylosus</i><br>VS2930                                                   |
| 36 | Ribeira (Montalegre)                         | Stream           | lotic  | 41°50'41.6"N<br>7°42'54.3"W | 28/10/2019 |                                                                               |
| 37 | Rio (Montalegre)                             | River            | lotic  | 41°49'43.4"N<br>7°47'15.4"W | 04/11/2019 | <i>S. aureus</i><br>VS2873, <i>S. vitulinus</i> VS2926                        |
| 38 | Rio Cavado<br>(Montalegre)                   | River            | lotic  | 41°48'55.8"N<br>7°50'51.0"W | 04/11/2019 | MRSA VS2849,<br><i>S. vitulinus</i><br>VS2925                                 |
| 39 | Regadio (Vilaça)                             | Irrigation ditch | lotic  | 41°47'15.9"N<br>7°54'07.4"W | 04/11/2019 | <i>S. xylosus</i><br>VS2928                                                   |
| 40 | Barragem do<br>Alto Rabagão<br>(Montalegre)  | Dam              | lentic | 41°44'23.8"N<br>7°51'23.1"W | 04/11/2019 | <i>S. sciuri</i> VS2910,<br><i>S. carnosus</i> spp.<br><i>carnosus</i> VS2881 |
| 41 | Ribeira Cargual<br>(Barracão)                | Stream           | lotic  | 41°45'56.0"N<br>7°42'36.4"W | 04/11/2019 | <i>S. sciuri</i> VS2919,<br><i>S. xylosus</i><br>VS2927                       |
| 42 | Rio Beça (Boticas)                           | River            | lotic  | 41°40'49.4"N<br>7°42'43.0"W | 04/11/2019 | <i>S. aureus</i> VS2864                                                       |
| 43 | Ribeira de Portelagem (Boticas)              | Stream           | lotic  | 41°45'02.5"N<br>7°41'26.5"W | 04/11/2019 | <i>S. caprae</i> VS2880                                                       |
| 44 | Ribeira Corgo<br>dos Mouros<br>(Montalegre)  | Stream           | lotic  | 41°44'04.8"N<br>7°41'26.5"W | 04/11/2019 | <i>S. epidermidis</i><br>VS2886                                               |
| 45 | Ribeira (Boticas)                            | Stream           | lotic  | 41°41'27.6"N<br>7°40'41.6"W | 04/11/2019 | <i>S. sciuri</i> VS2912                                                       |

|    |                                              |                  |        |                             |            |                                                                                                        |
|----|----------------------------------------------|------------------|--------|-----------------------------|------------|--------------------------------------------------------------------------------------------------------|
| 46 | Rio Tâmega (Ribeira de Pena)                 | River            | lotic  | 41°32'22.6"N<br>7°47'45.2"W | 04/11/2019 | <i>S. cohnii</i> spp.<br><i>urealyticus</i><br>VS2882                                                  |
| 47 | Rio Louredo (Cerva)                          | River            | lotic  | 41°29'39.1"N<br>7°48'17.9"W | 04/11/2019 |                                                                                                        |
| 48 | Rio Poio (Cerva)                             | River            | lotic  | 41°28'12.0"N<br>7°51'16.9"W | 04/11/2019 | MRSA VS2847                                                                                            |
| 49 | Regadio (Bor-bela)                           | Irrigation ditch | lotic  | 41°19'23.6"N<br>7°44'41.4"W | 04/11/2019 | <i>S. aureus</i> VS2865                                                                                |
| 50 | Regadio (Bor-bela)                           | Irrigation ditch | lotic  | 41°19'04.9"N<br>7°44'31.8"W | 04/11/2019 | <i>S. sciuri</i> VS2916                                                                                |
| 51 | Fonte Serra Alvão (Vila Real)                | Fountain         | lentic | 41°20'43.4"N<br>7°47'14.4"W | 11/11/2019 |                                                                                                        |
| 52 | Rio Olo (Lamas de Olo, Vila Real)            | River            | lotic  | 41°21'55.9"N<br>7°53'36.5"W | 11/11/2019 | <i>S. sciuri</i> VS2902                                                                                |
| 53 | Ribeira (Lamas de Olo, Vila Real)            | Stream           | lotic  | 41°22'28.4"N<br>7°48'23.2"W | 11/11/2019 | <i>S. aureus</i> VS2866                                                                                |
| 54 | Regadio (Pio-ledo, Vila Real)                | Irrigation ditch | lotic  | 41°23'32.8"N<br>7°50'49.8"W | 11/11/2019 | <i>S. aureus</i><br>VS2870; <i>S.</i><br><i>pseudintermedius</i><br>VS2879, <i>S. sciuri</i><br>VS2903 |
| 55 | Cascatas de Bilhó (Vila Real)                | Stream           | lotic  | 41°23'47.8"N<br>7°50'52.9"W | 11/11/2019 |                                                                                                        |
| 56 | Regadio (Bilhó, Vila Real)                   | Irrigation ditch | lotic  | 41°24'53.5"N<br>7°51'12.7"W | 11/11/2019 | <i>S. aureus</i> VS2867                                                                                |
| 57 | Cascatas do Alvão (Vale de Celas, Vila Real) | Stream           | lotic  | 41°25'16.3"N<br>7°51'53.5"W | 11/11/2019 | <i>S. aureus</i> VS2868                                                                                |
| 58 | Rio Cabril (Mondim de Basto)                 | River            | lotic  | 41°23'59.3"N<br>7°57'20.5"W | 11/11/2019 | <i>S. sciuri</i> VS2901                                                                                |

|    |                                             |                  |        |                             |            |                                                                                   |
|----|---------------------------------------------|------------------|--------|-----------------------------|------------|-----------------------------------------------------------------------------------|
| 59 | Ribeira<br>(Campeã, Vila Real)              | Stream           | lotic  | 41°17'49.5"N<br>7°53'37.6"W | 11/11/2019 | <i>S. lentus</i> VS2889                                                           |
| 60 | Regadio<br>(Campeã, Vila Real)              | Irrigation ditch | lotic  | 41°17'19.7"N<br>7°52'19.2"W | 11/11/2019 | <i>S. aureus</i><br>VS2869, <i>S. cohnii</i><br>spp. <i>urealyticus</i><br>VS2883 |
| 61 | Rio Sordo (Vila Real)                       | River            | lotic  | 41°16'01.9"N<br>7°46'54.6"W | 11/11/2019 | <i>S. sciuri</i> VS2904                                                           |
| 62 | Rio Tuela (Mirandela)                       | River            | lotic  | 41°30'35.5"N<br>7°11'49.8"W | 18/11/2019 |                                                                                   |
| 63 | Rio Rabaçal (Mirandela)                     | River            | lotic  | 41°31'04.0"N<br>7°12'35.5"W | 18/11/2019 | MRSA VS2848                                                                       |
| 64 | Ribeira (Mirandela)                         | Stream           | lotic  | 41°29'40.6"N<br>7°10'49.7"W | 18/11/2019 |                                                                                   |
| 65 | Rio Torto (Valpaços)                        | River            | lotic  | 41°33'23.3"N<br>7°16'58.5"W | 18/11/2019 |                                                                                   |
| 66 | Canal/regadio (Valpaços)                    | Irrigation ditch | lotic  | 41°36'19.0"N<br>7°18'28.9"W | 18/11/2019 |                                                                                   |
| 67 | Rio Calvo (Valpaços)                        | River            | lotic  | 41°37'34.3"N<br>7°15'52.3"W | 18/11/2019 |                                                                                   |
| 68 | Rio Tua (Mirandela)                         | River            | lotic  | 41°28'50.2"N<br>7°11'12.8"W | 18/11/2019 | <i>S. aureus</i> VS2874                                                           |
| 69 | Ribeira (Mirandela)                         | Stream           | lotic  | 41°29'43.0"N<br>7°09'30.1"W | 18/11/2019 |                                                                                   |
| 70 | Barragem de Cedães (Mirandela)              | Dam              | lentic | 41°28'51.3"N<br>7°07'42.6"W | 18/11/2019 |                                                                                   |
| 71 | Canal Vale de Prados (Macedo de Cavaleiros) | Irrigation ditch | lotic  | 41°32'54.6"N<br>6°56'51.6"W | 18/11/2019 | <i>S. epidermidis</i><br>VS2887                                                   |
| 72 | Rio Azibo (Macedo de Cavaleiros)            | River            | lotic  | 41°31'37.4"N<br>6°54'03.5"W | 18/11/2019 |                                                                                   |

|    |                                             |        |        |                             |            |                                                                                            |
|----|---------------------------------------------|--------|--------|-----------------------------|------------|--------------------------------------------------------------------------------------------|
| 73 | Ribeira de Ped-racho (Macedo de Cavaleiros) | Stream | lotic  | 41°31'38.1"N<br>6°53'16.4"W | 18/11/2019 | <i>S. sciuri</i> VS2921                                                                    |
| 74 | Ribeira de Noura (Murça)                    | Stream | lotic  | 41°24'33.3"N<br>7°24'59.2"W | 18/11/2019 | <i>S. aureus</i><br>VS2876, <i>S. sciuri</i><br>VS2913, <i>S.</i><br><i>equorum</i> VS2888 |
| 75 | Rio Tinhel (Murça)                          | River  | lotic  | 41°23'25.1"N<br>7°27'00.7"W | 18/11/2019 | <i>S. aureus</i><br>VS2875, <i>S. sciuri</i><br>VS2922                                     |
| 76 | Ribeira de Jor-jais (Murça)                 | Stream | lotic  | 41°22'11.8"N<br>7°33'59.0"W | 18/11/2019 |                                                                                            |
| 77 | Rio Pinhão (Vila Real)                      | River  | lotic  | 41°21'08.4"N<br>7°35'31.0"W | 18/11/2019 | <i>S. lentus</i> VS2891,<br><i>S. simulans</i><br>VS2923                                   |
| 78 | Barragem do Azibo (Macedo de Cavaleiros)    | Dam    | lentic | 41°34'52.2"N<br>6°53'54.2"W | 18/11/2019 | <i>S. aureus</i><br>VS2877, <i>S. sciuri</i><br>VS2920                                     |
